# Supplementary material
Source: PubMed Central journal article supplement (PMC3294835)
Supplement: supp_194.6.1582_TableS1.pdf [file supp_194.6.1582_TableS1.pdf]

**Table S1: Summary of microarray gene expression profile of *P.gingivalis* under single NO stress.**

| <b>Gene ID<sup>a</sup></b> | <b>Common Name</b>                                                    | <b>Function</b>                                        | <b>Fold-Change</b> | <b>p value</b> |
|----------------------------|-----------------------------------------------------------------------|--------------------------------------------------------|--------------------|----------------|
| PG1181                     | Hypothetical protein (probable transcriptional regulator tetR family) | Unknown                                                | 76.18              | 2.29E-07       |
| PG0612                     | Hypothetical protein                                                  | Unknown                                                | 29.10              | 0.00089        |
| PG1019                     | Hypothetical protein                                                  | Unknown                                                | 24.24              | 2.10E-06       |
| PG1178                     | Hypothetical protein                                                  | Unknown                                                | 12.18              | 1.28E-06       |
| PG1179                     | Conserved hypothetical protein                                        | Unknown                                                | 11.95              | 0.000134       |
| PG1236                     | Hypothetical protein                                                  | Unknown                                                | 11.94              | 2.52E-05       |
| PG0914                     | Hypothetical protein                                                  | Unknown                                                | 11.34              | 7.57E-05       |
| PG1858                     | fldA Flavodoxin A                                                     | Energy metabolism; Electron transport                  | 11.28              | 0.00023        |
| PG0411                     | PG57 (possible outer membrane protein)                                | Cell envelope                                          | 9.43               | 0.000176       |
| PG0999                     | Hypothetical protein                                                  | Unknown                                                | 9.19               | 0.001852       |
| PG1492                     | Hypothetical protein                                                  | Unknown                                                | 9.16               | 0.005424       |
| PG0409                     | Conserved hypothetical protein                                        | Unknown                                                | 8.90               | 2.41E-05       |
| PG0613                     | Possible outer membrane-associated protein P23                        | Cell envelope                                          | 8.03               | 0.000382       |
| PG1180                     | Conserved hypothetical protein (probable membrane transport protein)  | Unknown                                                | 7.89               | 0.000379       |
| PG0408                     | ileS Isoleucyl-tRNA synthetase                                        | Translation; Aminoacyl-tRNA synthetases                | 7.80               | 0.000559       |
| PG1237                     | Possible transcriptional regulator                                    | Regulatory functions                                   | 7.74               | 6.20E-08       |
| PG1030                     | Hypothetical protein                                                  | Unknown                                                | 7.37               | 0.001316       |
| PG0410                     | Conserved hypothetical protein                                        | Unknown                                                | 6.93               | 0.000281       |
| PG0245                     | UspA Universal stress protein                                         | Cellular processes; Adaptations to atypical conditions | 6.84               | 0.000107       |
| PG1493                     | Conserved hypothetical protein                                        | Unknown                                                | 6.74               | 0.001988       |
| PG1491                     | Hypothetical protein                                                  | Unknown                                                | 6.53               | 7.56E-05       |
| PG0521                     | GroES protein 10 kDa chaperonin/heat shock protein (protein cpn10)    | Protein fate; Protein folding and stabilization        | 6.37               | 0.001182       |
| PG0614                     | Hypothetical protein                                                  | Unknown                                                | 6.31               | 0.000224       |
| PG0997                     | Hypothetical protein                                                  | Unknown                                                | 6.03               | 0.002304       |
| PG0611                     | Possible lipoprotein                                                  | Unassigned                                             | 5.74               | 8.70E-05       |
| PG0495                     | Conserved hypothetical protein                                        | Unknown                                                | 5.71               | 0.000293       |
| PG1551                     | hmuY protein tonB-dependent receptor                                  | Transport and binding; Cations                         | 5.63               | 1.26E-05       |
| PG1000                     | Hypothetical protein                                                  | Unknown                                                | 5.43               | 0.000193       |
| PG0004                     | Probable phosphoribosyltransferase transcriptional regulator          | Regulatory functions                                   | 5.40               | 3.59E-06       |
| PG1326                     | Outer membrane receptor; putative hemagglutinin                       | Cell envelope                                          | 5.36               | 0.000413       |
| PG0090                     | dps DNA-binding stress protein                                        | Cellular processes; Adaptations to atypical conditions | 5.23               | 0.002799       |
| PG1001                     | Conserved hypothetical protein                                        | Unknown                                                | 5.03               | 0.002784       |

|        |                                                                        |                                                                                                  |      |          |
|--------|------------------------------------------------------------------------|--------------------------------------------------------------------------------------------------|------|----------|
| PG1870 | Methyltransferase                                                      | Uncategorized                                                                                    | 4.83 | 0.000327 |
| PG1798 | Immunoreactive 46 kDa antigen PG99                                     | Uncategorized                                                                                    | 4.80 | 0.001417 |
| PG0045 | htpG heat shock protein; HSP90 family                                  | Cellular processes; Chaperones                                                                   | 4.79 | 0.000586 |
| PG0319 | Conserved hypothetical protein                                         | Unknown                                                                                          | 4.69 | 6.21E-05 |
| PG1829 | fadD long-chain-fatty-acid-CoA ligase (probable polyketide synthetase) | Fatty acid and phospholipid metabolism                                                           | 4.48 | 9.11E-05 |
| PG0778 | gcp (possible glycoprotein endopeptidase)                              | Protein fate; Degradation of proteins, peptides and glycopeptides                                | 4.38 | 0.000186 |
| PG0466 | Conserved hypothetical protein                                         | Unknown                                                                                          | 4.37 | 0.000191 |
| PG1837 | hagA HbR hemagglutinin/adhesin precursor hagA                          | Cellular processes; Pathogenesis                                                                 | 4.37 | 7.27E-05 |
| PG0861 | Superfamily II helicase                                                | Transcription                                                                                    | 4.36 | 0.000703 |
| PG2215 | manC Mannose-1-phosphate guanylyltransferase                           | Purines, pyrimidines, nucleosides and nucleotides; Sugar-nucleotide Biosynthesis and conversions | 4.30 | 2.88E-05 |
| PG0777 | etfB electron transfer flavoprotein beta subunit                       | Energy metabolism; Electron transport                                                            | 4.29 | 5.52E-06 |
| PG1765 | acpP acyl carrier protein                                              | Fatty acid and phospholipid metabolism; Biosynthesis                                             | 4.22 | 0.000234 |
| PG1210 | Xaa-Pro aminopeptidase                                                 | Amino acid biosynthesis                                                                          | 4.06 | 0.000988 |
| PG1320 | ISPg1 fragment (IS1126-related transposase fragment)                   | Transposon functions                                                                             | 4.04 | 2.09E-05 |
| PG2049 | Hypothetical protein                                                   | Unknown                                                                                          | 4.03 | 0.018452 |
| PG0246 | UstA stationary-phase-upregulated protein                              | Cellular processes; Adaptations to atypical conditions                                           | 4.00 | 5.36E-05 |
| PG0460 | ISPg1 transposase (IS1106-related transposase)                         | Transposon functions                                                                             | 3.96 | 0.000153 |
| PG2031 | Hypothetical protein                                                   | Unknown                                                                                          | 3.90 | 0.001538 |
| PG0549 | ISPg1 transposase (IS1106-related transposase)                         | Transposon functions                                                                             | 3.84 | 0.000144 |
| PG0184 | ISPg1 transposase (IS1106-related transposase)                         | Transposon functions                                                                             | 3.80 | 0.00105  |
| PG1002 | Hypothetical protein                                                   | Unknown                                                                                          | 3.79 | 0.007273 |
| PG2048 | Hypothetical protein                                                   | Unknown                                                                                          | 3.74 | 0.000359 |
| PG1682 | Glycosyl transferase, group 1 family protein                           | Unassigned                                                                                       | 3.73 | 0.000734 |
| PG1652 | Probable integral outer membrane protein P64                           | Cell envelope                                                                                    | 3.60 | 0.000256 |
| PG0386 | Recombinase/integrase                                                  | DNA metabolism; DNA replication, restriction, modification, recombination, and repair            | 3.60 | 5.67E-05 |
| PG1857 | Hypothetical protein                                                   | Unknown                                                                                          | 3.52 | 0.000116 |
| PG1172 | Conserved hypothetical protein (containing ferredoxin-like domain)     | Unknown                                                                                          | 3.45 | 0.000101 |
| PG0776 | etfA electron transfer flavoprotein                                    | Energy metabolism; Electron                                                                      | 3.42 | 0.000273 |

|        |                                                                                             |                                                                                 |       |          |
|--------|---------------------------------------------------------------------------------------------|---------------------------------------------------------------------------------|-------|----------|
|        | alpha subunit                                                                               | transport                                                                       |       |          |
| PG1176 | ABC transporter protein (NBD and MSD domains)                                               | Transport and binding                                                           | 3.37  | 0.001575 |
| PG1212 | Hypothetical protein                                                                        | Unknown                                                                         | 3.33  | 0.000182 |
| PG1239 | fabG 3-oxacyl [acyl-carrier protein] reductase                                              | Fatty acid and phospholipid metabolism                                          | 3.32  | 3.81E-06 |
| PG1862 | Hypothetical protein                                                                        | Unknown                                                                         | 3.31  | 0.075455 |
| PG1240 | Conserved hypothetical protein (probable transcription regulator)                           | Unknown                                                                         | 3.29  | 0.000252 |
| PG0686 | Conserved hypothetical protein                                                              | Unknown                                                                         | 3.29  | 0.034171 |
| PG2172 | Hypothetical protein                                                                        | Unknown                                                                         | 3.27  | 0.000331 |
| PG1209 | Conserved hypothetical protein                                                              | Unknown                                                                         | 3.26  | 0.002942 |
| PG1681 | Agl malQ glycogen debranching enzyme/4-alpha-glucanotransferase                             | Energy metabolism; Biosynthesis and degradation of polysaccharides              | 3.25  | 0.000123 |
| PG1171 | Conserved hypothetical protein                                                              | Unknown                                                                         | 3.23  | 1.25E-06 |
| PG2190 | ftsE cell-division ATP-binding protein                                                      | Cellular processes; Cell division                                               | 3.19  | 0.000576 |
| PG0898 | Conserved hypothetical protein                                                              | Unknown                                                                         | 3.14  | 0.001674 |
| PG1683 | amyA alpha-amylase                                                                          | Energy metabolism; Sugars                                                       | 3.14  | 0.000921 |
| PG0860 | Hypothetical protein (possible transcription regulator Lambda repressor-like)               | Transcription                                                                   | 3.13  | 0.00085  |
| PG1770 | Hypothetical protein                                                                        | Unknown                                                                         | 3.09  | 0.000117 |
| PG2023 | fnt methionyl-tRNA formyltransferase                                                        | Translation, Amino Acid Metabolism, Methionine metabolism, biosynthetic process | 3.078 | 1.09E-05 |
| PG1025 | Hypothetical protein                                                                        | DNA metabolic process                                                           | 3.07  | 0.002919 |
| PG1003 | Conserved hypothetical protein                                                              | Unknown                                                                         | 3.02  | 0.00799  |
| PG2050 | Hypothetical protein                                                                        | Unknown                                                                         | 3.02  | 0.002325 |
| PG1291 | Hypothetical protein (phospholipase D family related)                                       | Metabolic process                                                               | 3.00  | 0.001128 |
| PG2042 | Hypothetical protein (AhpC-TSA, Thioredoxin-related)                                        | Unknown                                                                         | 2.99  | 0.006439 |
| PG1764 | fabF 3-oxoacyl-acyl-carrier-protein synthase                                                | Fatty acid and phospholipid metabolism                                          | 2.99  | 5.09E-05 |
| PG1732 | xerD integrase/recombinase (XerD-related)                                                   | DNA metabolism; DNA replication, recombination and repair                       | 2.98  | 3.14E-05 |
| PG0823 | Conserved hypothetical protein (possible transcriptional regulator)                         | Unknown                                                                         | 2.98  | 0.074261 |
| PG0933 | fusA translation elongation factor G protein                                                | Translation; Translation factors                                                | 2.98  | 9.12E-05 |
| PG1127 | asnC transcriptional regulatory protein                                                     | Transcription                                                                   | 2.98  | 0.002257 |
| PG1372 | Hypothetical protein                                                                        | Unknown                                                                         | 2.94  | 0.000208 |
| PG1684 | Hypothetical protein                                                                        | Unknown                                                                         | 2.93  | 0.001614 |
| PG0618 | ahpC ahpF alkyl hydroperoxide reductase subunit C (alkyl hydroperoxide reductase subunit F) | Cellular processes; Detoxification                                              | 2.91  | 0.040574 |

|        |                                                                              |                                                                                                |         |          |
|--------|------------------------------------------------------------------------------|------------------------------------------------------------------------------------------------|---------|----------|
| PG0340 | Hypothetical protein                                                         | Unknown                                                                                        | 2.91    | 0.002307 |
| PG1213 | ribonuclease H-related protein                                               | Transcription; Degradation of RNA                                                              | 2.85    | 0.000565 |
| PG0293 | Conserved hypothetical protein                                               | Unknown                                                                                        | 2.84    | 0.001489 |
| PG0339 | Hypothetical protein                                                         | Unknown                                                                                        | 2.83097 | 0.000636 |
| PG1219 | Conserved hypothetical protein                                               | Unknown                                                                                        | 2.82    | 0.00091  |
| PG0520 | groEL 60 kD chaperonin (protein cpn60; GroEL protein; heat shock protein 60) | Cellular processes; Chaperones                                                                 | 2.79    | 0.003218 |
| PG0161 | Pg-II fim c (Pg-II fimbriae c)                                               | Cell envelope; Surface structures                                                              | 2.77    | 0.012964 |
| PG1175 | ABC transporter, ATP-binding protein                                         | Transport and binding                                                                          | 2.77    | 3.24E-05 |
| PG1696 | Conserved hypothetical protein                                               | Unknown                                                                                        | 2.71    | 0.000964 |
| PG0468 | manA mannose-6-phosphate isomerase                                           | Energy metabolism; Sugars                                                                      | 2.70    | 0.000254 |
| PG1208 | dnaK (DnaK protein; Hsp70)                                                   | Regulatory functions                                                                           | 2.65    | 0.000213 |
| PG1330 | mscL large conductance mechanosensitive channel protein                      | Transport and binding                                                                          | 2.62    | 0.001839 |
| PG0350 | Conserved hypothetical protein                                               | Unknown                                                                                        | 2.60    | 0.002158 |
| PG0775 | acads mmgC yqiN acyl-CoA dehydrogenase (coenzyme A dehydrogenase)            | Uncategorized                                                                                  | 2.57    | 4.34E-06 |
| PG0638 | lpxK tetraacyldisaccharide 4'-kinase                                         | Cell envelope; Biosynthesis and degradation of surface polysaccharides and lipopolysaccharides | 2.55    | 2.31E-05 |
| PG1819 | Conserved hypothetical protein                                               | Unknown                                                                                        | 2.51    | 0.001309 |
| PG1626 | Possible outer membrane-associated protein P58                               | Cell envelope                                                                                  | 2.51    | 0.00014  |
| PG0862 | Probable type II DNA modification enzyme (methyltransferase)                 | DNA metabolism; Restriction/modification                                                       | 2.50    | 3.02E-06 |
| PG0706 | Hypothetical protein                                                         | Unknown                                                                                        | 2.50    | 0.006705 |
| PG1015 | Hypothetical protein                                                         | Unknown                                                                                        | 2.49    | 0.034398 |
| PG1625 | Hypothetical protein                                                         | Unknown                                                                                        | 2.49    | 0.004952 |
| PG1020 | Conserved hypothetical protein; possible outer membrane receptor protein     | Receptor activity; transporter activity                                                        | 2.48    | 0.004015 |
| PG0422 | Hypothetical protein                                                         | Unknown                                                                                        | 2.47    | 0.000495 |
| PG1623 | cprC nosR (probable membrane-bound regulatory protein NosR)                  | Regulatory functions                                                                           | 2.45    | 0.000266 |
| PG0347 | galE NAD-dependent epimerase/dehydratase                                     | Cell envelope; Biosynthesis and degradation of surface polysaccharides and lipopolysaccharides | 2.45    | 2.60E-05 |
| PG0465 | fur ferric uptake regulation protein                                         | Regulatory functions                                                                           | 2.45    | 0.000986 |
| PG1651 | Conserved hypothetical protein (possible TPR-repeat protein)                 | Unknown                                                                                        | 2.45    | 0.000508 |
| PG1777 | Conserved hypothetical protein                                               | Unknown                                                                                        | 2.44    | 0.018283 |
| PG1369 | gpsA NAD(P)H-dependent glycerol-3-phosphate dehydrogenase (NAD(P)H-          | Fatty acid and phospholipid metabolism                                                         | 2.43    | 0.003342 |

|        |                                                                                                       |                                                                                           |      |          |
|--------|-------------------------------------------------------------------------------------------------------|-------------------------------------------------------------------------------------------|------|----------|
|        | dependent dihydroxyacetone-phosphate reductase)                                                       |                                                                                           |      |          |
| PG0058 | nadD yqeJ nicotinate-nucleotide adenylyltransferase                                                   | Nicotinate and nicotinamide metabolism                                                    | 2.42 | 0.012686 |
| PG1211 | Conserved hypothetical protein (possible carbonic anhydrase)                                          | Unknown                                                                                   | 2.42 | 0.000582 |
| PG0344 | Conserved hypothetical protein                                                                        | Unknown                                                                                   | 2.42 | 0.014029 |
| PG0012 | hisC histidinol-phosphate aminotransferase                                                            | Amino acid biosynthesis; Histidine family                                                 | 2.41 | 0.003724 |
| PG0998 | Hypothetical protein                                                                                  | Unknown                                                                                   | 2.41 | 0.002473 |
| PG1602 | tla tlr tonB-linked receptor Tlr                                                                      | Receptor activity; transporter activity                                                   | 2.41 | 0.013588 |
| PG1775 | grpE (GrpE-related chaperonin; HSP-70 cofactor)                                                       | Cellular processes; Chaperones                                                            | 2.40 | 0.00064  |
| PG2189 | lysC aspartokinase-I                                                                                  | Amino acid biosynthesis; Aspartate family                                                 | 2.39 | 0.000111 |
| PG1063 | Conserved hypothetical protein (possible transcriptional regulator)                                   | Unknown                                                                                   | 2.39 | 0.001038 |
| PG1362 | Conserved hypothetical protein (possible oxidoreductase)                                              | Unknown                                                                                   | 2.38 | 0.000741 |
| PG0920 | Glycosyltransferase (possible polyprenol phosphate mannosyl transferase 1)                            | Uncategorized                                                                             | 2.38 | 0.004919 |
| PG2208 | Conserved hypothetical protein                                                                        | Unknown                                                                                   | 2.38 | 0.07226  |
| PG1793 | glgB 1,4-alpha-glucan branching enzyme                                                                | Energy metabolism; Biosynthesis and degradation of polysaccharides                        | 2.35 | 0.000618 |
| PG0060 | Hypothetical protein                                                                                  | Unknown                                                                                   | 2.35 | 0.003634 |
| PG0560 | Unknown                                                                                               | Unknown                                                                                   | 2.34 | 3.06E-06 |
| PG1080 | hbd 3-hydroxybutyryl-CoA dehydrogenase; BHBD)                                                         | Fatty acid and phospholipid metabolism                                                    | 2.33 | 0.011712 |
| PG1697 | Restriction endonuclease                                                                              | DNA metabolism; Restriction/modification                                                  | 2.32 | 0.000448 |
| PG1792 | napA Na <sup>+</sup> /H <sup>+</sup> -exchanging protein (Na <sup>+</sup> /H <sup>+</sup> antiporter) | Transport and binding; Cations                                                            | 2.32 | 9.72E-05 |
| PG0020 | Possible transcriptional regulator, MarR family                                                       | Regulatory functions                                                                      | 2.32 | 0.002387 |
| PG1085 | Hypothetical protein                                                                                  | Unknown                                                                                   | 2.32 | 0.028468 |
| PG0278 | Hypothetical protein                                                                                  | Unknown                                                                                   | 2.31 | 0.00023  |
| PG0438 | Conserved hypothetical protein                                                                        | Unknown                                                                                   | 2.31 | 0.000137 |
| PG1151 | Conserved hypothetical protein (probable alcohol dehydrogenase)                                       | Unknown                                                                                   | 2.29 | 0.002559 |
| PG1371 | udp udp2 uridine phosphorylase                                                                        | Purines, pyrimidines, nucleosides and nucleotides; Salvage of nucleosides and nucleotides | 2.27 | 0.002429 |
| PG1759 | ABC transporter (SBP domain); adhesin                                                                 | Transport and binding                                                                     | 2.26 | 0.007114 |
| PG2010 | mrsA phosphomannomutase/ phosphoglucomutase                                                           | Energy metabolism; Sugars                                                                 | 2.25 | 0.003112 |

|        |                                                                                                       |                                                                                           |      |          |
|--------|-------------------------------------------------------------------------------------------------------|-------------------------------------------------------------------------------------------|------|----------|
| PG0705 | glr murI glutamate racemase                                                                           | Cell envelope; Biosynthesis of murein sacculus and peptidoglycan                          | 2.24 | 0.000236 |
| PG2060 | thyA thymidylate synthase                                                                             | Purines, pyrimidines, nucleosides and nucleotides; 2'-Deoxyribonucleotide metabolism      | 2.24 | 0.001035 |
| PG1778 | Conserved hypothetical protein                                                                        | Unknown                                                                                   | 2.24 | 0.000436 |
| PG1820 | nrfA cytochrome c nitrite reductase large subunit                                                     | Energy metabolism; Electron transport                                                     | 2.23 | 0.000481 |
| PG2006 | Conserved hypothetical protein                                                                        | Unknown                                                                                   | 2.23 | 0.128591 |
| PG0558 | pnp yqkO purine nucleoside phosphorylase                                                              | Purines, pyrimidines, nucleosides and nucleotides; Salvage of nucleosides and nucleotides | 2.23 | 0.001942 |
| PG1341 | Probable outer membrane lipoprotein P15                                                               | Cell envelope                                                                             | 2.22 | 0.005083 |
| PG2024 | hagE rgpA arginine-specific cysteine proteinase; gingipain R1                                         | Protein fate; Degradation of proteins, peptides and glycopeptides                         | 2.22 | 0.000994 |
| PG1552 | hmuR tonB-dependent receptor HmuR (or HemR)                                                           | Transport and binding; Cations                                                            | 2.21 | 0.000217 |
| PG0249 | oadA probable oxaloacetate decarboxylase alpha subunit                                                | Transport and binding; Cations                                                            | 2.20 | 0.007731 |
| PG2030 | Hypothetical protein                                                                                  | Unknown                                                                                   | 2.19 | 0.000266 |
| PG1863 | Hypothetical protein                                                                                  | Unknown                                                                                   | 2.19 | 0.075952 |
| PG0471 | Conserved hypothetical protein                                                                        | Unknown                                                                                   | 2.19 | 0.000701 |
| PG0356 | Conserved hypothetical protein                                                                        | Unknown                                                                                   | 2.18 | 0.000123 |
| PG0056 | Conserved hypothetical protein                                                                        | Unknown                                                                                   | 2.18 | 0.036954 |
| PG1877 | nhaA Na <sup>+</sup> /H <sup>+</sup> -exchanging protein (Na <sup>+</sup> /H <sup>+</sup> antiporter) | Transport and binding; Cations                                                            | 2.18 | 0.011702 |
| PG1230 | Hypothetical protein                                                                                  | Unknown                                                                                   | 2.18 | 0.003043 |
| PG2213 | Possible nitrite reductase-related protein                                                            | Uncategorized                                                                             | 2.17 | 0.085316 |
| PG0104 | Top3 topB DNA topoisomerase III                                                                       | DNA metabolism; DNA replication, recombination and repair                                 | 2.16 | 0.000659 |
| PG1316 | Conserved hypothetical protein                                                                        | Unknown                                                                                   | 2.15 | 0.007793 |
| PG0174 | noxA noxC NADH oxidase/oxidase                                                                        | Energy metabolism                                                                         | 2.15 | 0.015847 |
| PG1058 | pal peptidoglycan-associated lipoprotein                                                              | Cell envelope; Biosynthesis of murein sacculus and peptidoglycan                          | 2.15 | 5.83E-05 |
| PG1334 | Conserved hypothetical protein (possible secreted protein; possible protease; stomatin-like protein)  | Unknown                                                                                   | 2.14 | 0.00054  |
| PG1368 | pgi glucose-6-phosphate isomerase                                                                     | Energy metabolism; Glycolysis/gluconeogenesis                                             | 2.13 | 0.003417 |
| PG1653 | Conserved hypothetical protein                                                                        | Unknown                                                                                   | 2.13 | 1.35E-05 |
| PG0669 | cbiK ihtB fetB heme-binding                                                                           | Cell envelope                                                                             | 2.13 | 0.000538 |

|        |                                                                                        |                                                                                       |       |             |
|--------|----------------------------------------------------------------------------------------|---------------------------------------------------------------------------------------|-------|-------------|
|        | protein/peripheral outer membrane chelatase                                            |                                                                                       |       |             |
| PG0351 | Hypothetical protein                                                                   | Unknown                                                                               | 2.12  | 0.048539    |
| PG1361 | Ptp-A prolyl tripeptidyl peptidase                                                     | Protein fate; Degradation of proteins, peptides and glycopeptides                     | 2.11  | 0.00315     |
| PG0403 | Hypothetical protein                                                                   | Unknown                                                                               | 2.10  | 0.000721    |
| PG1881 | Conserved hypothetical protein                                                         | Unknown                                                                               | 2.08  | 0.003563    |
| PG0923 | rbfA ribosome binding factor A                                                         | Translation; Translation factors                                                      | 2.078 | 0.001049    |
| PG1355 | Conserved hypothetical protein (probable 1-acylglycerol-3-phosphate O-acyltransferase) | Unknown                                                                               | 2.04  | 0.000547    |
| PG1356 | Conserved hypothetical protein                                                         | Unknown                                                                               | 2.03  | 0.003276    |
| PG0660 | NADPH-oxidoreductase                                                                   | Energy metabolism                                                                     | 2.02  | 0.000332    |
| PG1808 | relA GTP pyrophosphokinase, (p)ppGpp synthetase                                        | Regulatory functions                                                                  | 2.02  | 0.002524    |
| PG0257 | ycf24 ABC transporter subunit                                                          | Transport and binding                                                                 | -2.00 | 0.219046    |
| PG0199 | Conserved hypothetical protein                                                         | Unknown                                                                               | -2.01 | 0.00161299  |
| PG1566 | gltX gluS glutamyl-tRNA synthetase (glutamate--tRNA ligase)                            | Translation; Aminoacyl-tRNA synthetases                                               | -2.01 | 0.00448847  |
| PG0889 | pepP probable Xaa-Pro dipeptidase                                                      | Protein fate; Degradation of proteins, peptides and glycopeptides                     | -2.02 | 0.0300502   |
| PG1278 | serC yhaF phosphoserine aminotransferase (PSAT) (vegetative protein 234)               | Amino acid biosynthesis; Serine family                                                | -2.02 | 0.00125546  |
| PG0952 | gcpE ispG 1-hydroxy-2-methyl-2-(E)-butenyl 4-diphosphate synthase                      | Cell envelope                                                                         | -2.03 | 0.0017864   |
| PG1805 | atpD H <sup>+</sup> -transporting ATP synthase subunit D                               | Energy metabolism; ATP-proton motive force                                            | -2.03 | 0.0017022   |
| PG1596 | ileS isoleucyl-tRNA synthetase (isoleucine--tRNA ligase; mupirocin resistance protein) | Translation; Aminoacyl-tRNA synthetases                                               | -2.04 | 0.000413148 |
| PG1430 | Hypothetical protein                                                                   | Unknown                                                                               | -2.04 | 0.00501883  |
| PG0432 | fmu nol1 proliferating-cell nucleolar protein/rRNA methylase                           | Protein fate; Protein modification and repair                                         | -2.04 | 0.0398006   |
| PG0302 | Hypothetical protein                                                                   | Unknown                                                                               | -2.05 | 0.00935446  |
| PG1728 | Conserved hypothetical protein (possible deaminase)                                    | Unknown                                                                               | -2.06 | 0.00263916  |
| PG1039 | Conserved hypothetical protein                                                         | Unknown                                                                               | -2.07 | 0.000539893 |
| PG1706 | Hypothetical protein                                                                   | Unknown                                                                               | -2.07 | 0.0182339   |
| PG0114 | Hypothetical protein                                                                   | Unknown                                                                               | -2.07 | 0.0109611   |
| PG0243 | Hypothetical protein                                                                   | Unknown                                                                               | -2.08 | 0.00137145  |
| PG2150 | Conserved hypothetical protein, with LysM repeats                                      | Unknown                                                                               | -2.08 | 0.00063887  |
| PG0791 | adk adenylate kinase                                                                   | Purines, pyrimidines, nucleosides and nucleotides; Purine ribonucleotide biosynthesis | -2.09 | 0.00638964  |

|        |                                                                                |                                                                                             |       |             |
|--------|--------------------------------------------------------------------------------|---------------------------------------------------------------------------------------------|-------|-------------|
| PG1564 | dTDP-4-dehydrorhamnose 3,5-epimerase                                           | Nucleotide sugars metabolism; Polyketide sugar unit biosynthesis; Streptomycin biosynthesis | -2.09 | 0.000354666 |
| PG2112 | Hypothetical protein                                                           | Unknown                                                                                     | -2.10 | 0.00247654  |
| PG0555 | Conserved hypothetical protein                                                 | Unknown                                                                                     | -2.11 | 0.000297158 |
| PG1274 | efp efp1 elongation factor P                                                   | Translation; Translation factors                                                            | -2.13 | 0.227553    |
| PG1379 | Probable thiamine biosynthesis protein/ABC related SBP                         | Biosynthesis of cofactors, prosthetic groups and carriers; Thiamine                         | -2.14 | 0.0202777   |
| PG1739 | ppx probable exopolyphosphatase                                                | Central intermediary metabolism; Phosphorus compounds                                       | -2.14 | 0.00216975  |
| PG0415 | Conserved hypothetical protein (possible peptidyl-prolyl isomerase)            | Unknown                                                                                     | -2.14 | 0.00239185  |
| PG1297 | rpsA rs1 30S ribosomal protein S1                                              | Translation; Ribosomal proteins                                                             | -2.15 | 0.000142668 |
| PG0568 | efp efp1 elongation factor P                                                   | Translation; Translation factors                                                            | -2.16 | 0.210948    |
| PG2141 | fabH 3-oxyacyl-[acyl-carrier protein] synthase (KAS III)                       | Fatty acid and phospholipid metabolism                                                      | -2.16 | 0.00229179  |
| PG1357 | hmuY tonB-dependent receptor                                                   | Transport and binding; Cations                                                              | -2.16 | 0.0119302   |
| PG0908 | Conserved hypothetical protein                                                 | Unknown                                                                                     | -2.17 | 0.0339745   |
| PG0888 | thrS threonyl-tRNA synthetase                                                  | Translation; Aminoacyl-tRNA synthetases                                                     | -2.17 | 0.0937983   |
| PG1583 | batB bacteroides aerotolerance operon protein                                  | Cellular processes; Adaptations to atypical conditions                                      | -2.17 | 0.00540243  |
| PG0166 | pth spoVC peptidyl-tRNA hydrolase (stage V sporulation protein C)              | Translation; Translation factors                                                            | -2.18 | 0.000150659 |
| PG1866 | Hypothetical protein                                                           | Unknown                                                                                     | -2.18 | 0.00472218  |
| PG0451 | Conserved hypothetical protein (possible hemolysin-related protein)            | Unknown                                                                                     | -2.18 | 0.00770824  |
| PG0890 | ppb alkaline phosphatase                                                       | Central intermediary metabolism                                                             | -2.19 | 0.0230628   |
| PG1987 | Possible CRISPR-associated protein, TM1793 family                              | Mobile and extrachromosomal element functions; Other                                        | -2.19 | 0.135613    |
| PG0806 | Conserved hypothetical protein (possible meso-diaminopimelate D-dehydrogenase) | Unknown                                                                                     | -2.20 | 0.000120879 |
| PG1942 | rs12 30S ribosomal protein S12                                                 | Translation; Ribosomal proteins                                                             | -2.22 | 0.00193104  |
| PG0189 | Hypothetical protein                                                           | Unknown                                                                                     | -2.23 | 0.000549932 |
| PG0990 | rl35 50S ribosomal protein L35                                                 | Translation; Ribosomal proteins                                                             | -2.23 | 0.0172872   |
| PG0886 | Hypothetical protein                                                           | Unknown                                                                                     | -2.23 | 0.0828754   |
| PG0308 | Na <sup>+</sup> -translocating NADH-quinone oxidoreductase                     | Energy metabolism; Electron transport                                                       | -2.23 | 0.036167    |



|        |                                                                                                                                                                              |                                                                                       |       |             |
|--------|------------------------------------------------------------------------------------------------------------------------------------------------------------------------------|---------------------------------------------------------------------------------------|-------|-------------|
| PG0259 | Conserved hypothetical protein (possible ABC transporter related membrane protein)                                                                                           | Unknown                                                                               | -2.24 | 0.017125    |
| PG2177 | nqr6 Na <sup>+</sup> -translocating NADH-quinone reductase (possible phenolhydroxylase component)                                                                            | Biosynthesis of cofactors, prosthetic groups and carriers; Menaquinone and ubiquinone | -2.25 | 0.00172093  |
| PG1123 | purB adenylosuccinate lyase                                                                                                                                                  | Amino acid biosynthesis; Aspartate family                                             | -2.26 | 0.0210509   |
| PG1134 | trxB NADPH thioredoxin reductase                                                                                                                                             | Purines, pyrimidines, nucleosides and nucleotides; 2'-Deoxyribonucleotide metabolism  | -2.26 | 0.0163313   |
| PG0727 | sov gingipains secretion                                                                                                                                                     | Unknown                                                                               | -2.27 | 0.110241    |
| PG2033 | gltD glutamate synthase beta subunit (glutamate synthase small subunit)                                                                                                      | Amino acid biosynthesis; Glutamate family                                             | -2.28 | 0.000884514 |
| PG0046 | cdsA phosphatidate cytidylyltransferase (CDP diglyceride synthetase/ pyrophosphorylase/synthase; CTP:phosphatidate cytidylyltransferase; CDP-DAG synthase/CDP-DG synthetase) | Fatty acid and phospholipid metabolism                                                | -2.29 | 0.0153647   |
| PG1256 | rng cafE probable cytoplasmic axial filament protein/ribonuclease G                                                                                                          | Cellular processes; Cell division                                                     | -2.30 | 0.00223062  |
| PG0796 | leuS leucyl-tRNA synthetase                                                                                                                                                  | Translation; Aminoacyl-tRNA synthetases                                               | -2.30 | 0.00147635  |
| PG0565 | Hypothetical protein                                                                                                                                                         | Unknown                                                                               | -2.31 | 0.192126    |
| PG0034 | trxA thioredoxin                                                                                                                                                             | Energy metabolism; Electron transport                                                 | -2.31 | 0.0177046   |
| PG2216 | Conserved hypothetical protein                                                                                                                                               | Unknown                                                                               | -2.31 | 0.00189753  |
| PG0047 | ftsH ATPase/cell division protein/ATP-dependent zinc metallopeptidase                                                                                                        | Cellular processes; Cell division                                                     | -2.33 | 0.0333893   |
| PG2016 | Conserved hypothetical protein                                                                                                                                               | Unknown                                                                               | -2.34 | 0.039762    |
| PG0273 | Hypothetical protein                                                                                                                                                         | Unknown                                                                               | -2.35 | 0.00756591  |
| PG1257 | yacM ygbP ispD probable 4-diphosphocytidyl-2c-methyl-D-erythritol synthase (MEP cytidylyltransferase MCT)                                                                    | Uncategorized                                                                         | -2.35 | 0.0147797   |
| PG0592 | rl31 50S ribosomal protein L31                                                                                                                                               | Translation; Ribosomal proteins                                                       | -2.37 | 0.00629189  |
| PG0304 | rnfC electron transfer protein                                                                                                                                               | Energy metabolism; Electron transport                                                 | -2.38 | 0.00211701  |
| PG0434 | Conserved hypothetical protein                                                                                                                                               | Unknown                                                                               | -2.39 | 0.0942855   |
| PG1137 | PorS protein                                                                                                                                                                 | Uncategorized                                                                         | -2.39 | 0.00357371  |
| PG0783 | Conserved hypothetical protein (possible PHP hydrolase)                                                                                                                      | Unknown                                                                               | -2.43 | 0.000232109 |
| PG1382 | Conserved hypothetical protein                                                                                                                                               | Unknown                                                                               | -2.46 | 0.0159675   |
| PG0910 | Hypothetical protein                                                                                                                                                         | Unknown                                                                               | -2.48 | 0.00400277  |

|        |                                                                             |                                                                                       |       |             |
|--------|-----------------------------------------------------------------------------|---------------------------------------------------------------------------------------|-------|-------------|
| PG0256 | Possible CvpA family protein                                                | Unassigned                                                                            | -2.48 | 0.00528324  |
| PG1358 | Acetyltransferase                                                           | Uncategorized                                                                         | -2.49 | 0.0528641   |
| PG1060 | prc tsp probable tail-specific protease                                     | Protein fate; Degradation of proteins, peptides and glycopeptides                     | -2.49 | 0.00412581  |
| PG2088 | msrA peptide methionine sulfoxide reductase                                 | Protein fate; Protein modification and repair                                         | -2.52 | 0.000715319 |
| PG1115 | ffh signal recognition particle GTPase protein (SRP)                        | Protein fate; Protein and peptide secretion and trafficking                           | -2.52 | 0.000132477 |
| PG0375 | rl13 50S ribosomal protein L13                                              | Translation; Ribosomal proteins                                                       | -2.54 | 0.00252982  |
| PG0956 | Conserved hypothetical protein (possible membrane protein)                  | Unknown                                                                               | -2.57 | 0.000896432 |
| PG1941 | rs7 30S ribosomal protein S7                                                | Translation; Ribosomal proteins                                                       | -2.57 | 4.86E-05    |
| PG1940 | fusA elongation factor G protein                                            | Translation; Translation factors                                                      | -2.58 | 0.000960146 |
| PG1136 | Conserved hypothetical protein                                              | Unknown                                                                               | -2.61 | 0.000548983 |
| PG1582 | batA bacteroides aerotolerance operon protein, batA                         | Cellular processes; Adaptations to atypical conditions                                | -2.62 | 0.0481606   |
| PG0198 | Conserved hypothetical protein (possible cytochrome)                        | Unknown                                                                               | -2.66 | 0.00387575  |
| PG1124 | Conserved hypothetical protein                                              | Unknown                                                                               | -2.68 | 0.00448418  |
| PG1939 | rs10 30S ribosomal protein S10                                              | Translation; Ribosomal proteins                                                       | -2.69 | 0.000742838 |
| PG0307 | Na <sup>+</sup> -translocating NADH-quinone reductase                       | Energy metabolism; Electron transport                                                 | -2.70 | 0.00891258  |
| PG0191 | Probable outer membrane protein (Omp85 analog)                              | Cell envelope                                                                         | -2.71 | 0.00355811  |
| PG0203 | Conserved hypothetical protein                                              | Unknown                                                                               | -2.71 | 0.0492759   |
| PG0950 | gcsH gcvT yusH glycine cleavage H protein (glycine decarboxylase component) | Amino acid biosynthesis; Serine family                                                | -2.72 | 0.0635994   |
| PG2121 | ansA L-asparaginase I                                                       | Transport and binding; Amino acids, peptides and amines                               | -2.73 | 0.000710673 |
| PG0656 | rl34 50S ribosomal protein L34                                              | Translation; Ribosomal proteins                                                       | -2.73 | 0.019653    |
| PG0976 | purC phosphoribosylaminoimidazole-succinocarboxamide synthase               | Purines, pyrimidines, nucleosides and nucleotides; Purine ribonucleotide biosynthesis | -2.74 | 0.00413635  |
| PG0196 | Probable zinc protease/ 106 kDa immunoreactive protein                      | Protein fate; Degradation of proteins, peptides and glycopeptides                     | -2.75 | 0.000232942 |
| PG1440 | Hypothetical protein                                                        | Unknown                                                                               | -2.75 | 0.0734984   |
| PG0954 | Conserved hypothetical protein                                              | Unknown                                                                               | -2.76 | 0.00192231  |
| PG2085 | trpS tryptophanyl-tRNA synthetase                                           | Translation; Aminoacyl-tRNA synthetases                                               | -2.76 | 0.00172133  |

|        |                                                                                                |                                                                                                         |        |             |
|--------|------------------------------------------------------------------------------------------------|---------------------------------------------------------------------------------------------------------|--------|-------------|
| PG1234 | Hypothetical protein                                                                           | Unknown                                                                                                 | -2.78  | 0.0197403   |
| PG0253 | Conserved hypothetical protein                                                                 | Unknown                                                                                                 | -2.79  | 0.000420263 |
| PG1695 | Hypothetical protein                                                                           | Unknown                                                                                                 | -2.84  | 0.026891    |
| PG0519 | Conserved hypothetical protein<br>(possible membrane protein)                                  | Unknown                                                                                                 | -2.85  | 0.034238    |
| PG0752 | upp uracil phosphoribosyltransferase                                                           | Purines, pyrimidines,<br>nucleosides and nucleotides;<br>Salvage of nucleosides and<br>nucleotides      | -2.89  | 0.000233162 |
| PG1130 | Hypothetical protein                                                                           | Unknown                                                                                                 | -2.90  | 0.02242     |
| PG1707 | Hypothetical protein                                                                           | Unknown                                                                                                 | -2.92  | 0.00136067  |
| PG1301 | Hypothetical protein                                                                           | Unknown                                                                                                 | -2.93  | 0.00503025  |
| PG1375 | crp possible cAMP receptor protein<br>(catabolite gene activator; cAMP-<br>regulatory protein) | Regulatory functions                                                                                    | -2.94  | 0.00506127  |
| PG0750 | wcfJ glycosyltransferase                                                                       | Uncategorized                                                                                           | -2.94  | 0.000696555 |
| PG0715 | corA possible magnesium and cobalt<br>transport protein                                        | Transport and binding;<br>Cations                                                                       | -2.95  | 0.000675176 |
| PG0651 | Conserved hypothetical protein                                                                 | Unknown                                                                                                 | -2.97  | 7.50E-05    |
| PG0037 | r119 50S ribosomal protein L19                                                                 | Translation; Ribosomal<br>proteins                                                                      | -2.98  | 0.000296324 |
| PG0597 | r19 rpL9 50S ribosomal protein L9                                                              | Translation; Ribosomal<br>proteins                                                                      | -3.00  | 0.00117897  |
| PG0992 | thrS threonyl-tRNA synthetase                                                                  | Translation; Aminoacyl-tRNA<br>synthetases                                                              | -3.01  | 0.000230163 |
| PG0110 | Conserved hypothetical protein<br>(possible transferase)                                       | Unknown                                                                                                 | -3.01  | 0.000242252 |
| PG0120 | weeA UDP-N-acetylglucosamine 2-<br>epimerase (UDP-GlcNAc 2-<br>epimerase)                      | Cell envelope; Biosynthesis<br>and degradation of surface<br>polysaccharides and<br>lipopolysaccharides | -3.02  | 0.00309362  |
| PG1842 | Hypothetical protein                                                                           | Unknown                                                                                                 | -3.03  | 0.0292585   |
| PG0754 | top1 topA DNA topoisomerase I                                                                  | DNA metabolism; DNA<br>replication, recombination and<br>repair                                         | -3.03  | 3.81E-05    |
| PG0167 | ctc rplY 50S ribosomal protein<br>L25/general stress protein                                   | Translation; Ribosomal<br>proteins                                                                      | -3.04  | 0.000237394 |
| PG0709 | mip fkbP-type peptidyl-prolyl cis-trans<br>isomerase (MIP-like protein)                        | Protein fate; Protein folding<br>and stabilization                                                      | -3.045 | 0.00196868  |
| PG1401 | tnaA tryptophanase (tyrosine phenol-<br>lyase; beta-tyrosinase)                                | Energy metabolism; Amino<br>acids and amines                                                            | -3.05  | 0.000132057 |
| PG0953 | dut deoxyuridine 5'-triphosphate<br>nucleotidohydrolase (dUTPase)                              | Purines, pyrimidines,<br>nucleosides and nucleotides;<br>Pyrimidine ribonucleotide<br>biosynthesis      | -3.06  | 0.00317982  |
| PG2143 | yphC probable GTP binding protein                                                              | Uncategorized                                                                                           | -3.06  | 0.0011839   |
| PG0708 | fkbP-type peptidyl-prolyl cis-trans<br>isomerase                                               | Protein fate; Protein folding<br>and stabilization                                                      | -3.07  | 0.00229339  |
| PG0436 | Capsular polysaccharide transport<br>protein                                                   | Transport and binding<br>proteins; Carbohydrates,                                                       | -3.12  | 0.00338764  |

|        |                                                                                                   |                                                                   |        |             |
|--------|---------------------------------------------------------------------------------------------------|-------------------------------------------------------------------|--------|-------------|
|        |                                                                                                   | organic alcohols, and acids                                       |        |             |
| PG0286 | Conserved hypothetical protein                                                                    | Unknown                                                           | -3.14  | 0.00100015  |
| PG0856 | Conserved hypothetical protein                                                                    | Unknown                                                           | -3.21  | 0.0112079   |
| PG1513 | gpm pgm phosphoglycerate mutase                                                                   | Energy metabolism;<br>Glycolysis/gluconeogenesis                  | -3.22  | 0.012119    |
| PG1141 | wcgR probable glycosyltransferase                                                                 | Uncategorized                                                     | -3.26  | 0.0110025   |
| PG0188 | lipoprotein                                                                                       | Unassigned                                                        | -3.27  | 0.000370592 |
| PG0234 | immunoreactive 23kD antigen PG66                                                                  | Uncategorized                                                     | -3.30  | 0.000893454 |
| PG1723 | Hypothetical protein                                                                              | Unknown                                                           | -3.31  | 0.00192383  |
| PG2140 | rl32 50S ribosomal protein L32                                                                    | Translation; Ribosomal<br>proteins                                | -3.33  | 0.0149921   |
| PG0086 | DEAD BOX-related helicase                                                                         | Transcription; Transcription<br>factors                           | -3.37  | 0.000735946 |
| PG1936 | rl23 50S ribosomal protein L23                                                                    | Translation; Ribosomal<br>proteins                                | -3.37  | 0.00533939  |
| PG1803 | vatA atpA ATP synthase subunit A<br>(V-type ATPase subunit A)                                     | Energy metabolism; ATP-<br>proton motive force                    | -3.41  | 0.00057516  |
| PG1258 | hup ihfA histone-like DNA binding<br>protein, IHFA, IHFB, or DBH                                  | DNA metabolism; DNA<br>replication, recombination and<br>repair   | -3.44  | 0.000827139 |
| PG1828 | Putative lipoprotein                                                                              | Cell envelope                                                     | -3.49  | 0.00184914  |
| PG1895 | Hypothetical protein                                                                              | Unknown                                                           | -3.49  | 0.0427234   |
| PG1960 | rl28 50S ribosomal protein L28                                                                    | Translation; Ribosomal<br>proteins                                | -3.51  | 0.00172982  |
| PG2125 | transcription regulator                                                                           | Regulatory functions                                              | -3.54  | 0.000463365 |
| PG0106 | probable glycosyltransferase                                                                      | Uncategorized                                                     | -3.54  | 0.00529746  |
| PG1598 | lspA possible lipoprotein signal<br>peptidase                                                     | Protein fate; Protein and<br>peptide secretion and<br>trafficking | -3.56  | 0.00779254  |
| PG2117 | rs16 30S ribosomal protein S16                                                                    | Translation; Ribosomal<br>proteins                                | -3.59  | 0.000649532 |
| PG2192 | Conserved hypothetical protein<br>(possible membrane protein related to<br>metalloendopeptidases) | Unknown                                                           | -3.62  | 3.38E-05    |
| PG1121 | asnS asparaginyl-tRNA synthetase<br>(asparagine--tRNA ligase)                                     | Translation; Aminoacyl-tRNA<br>synthetases                        | -3.62  | 0.00175848  |
| PG0807 | Hypothetical protein with conserved<br>nusB domain                                                | Unknown                                                           | -3.64  | 0.00223053  |
| PG0457 | Hypothetical protein                                                                              | Unknown                                                           | -3.65  | 0.00457209  |
| PG0275 | trxA thioredoxin                                                                                  | Energy metabolism; Electron<br>transport                          | -3.67  | 0.0432035   |
| PG0955 | Hypothetical protein                                                                              | Unknown                                                           | -3.72  | 0.0021198   |
| PG0452 | Possible peptidyl-prolyl isomerase                                                                | Protein fate; Protein folding<br>and stabilization                | -3.76  | 0.000163616 |
| PG0118 | Glycosyltransferase                                                                               | Uncategorized                                                     | -3.92  | 0.00775525  |
| PG1501 | Hypothetical protein                                                                              | Unknown                                                           | -3.94  | 4.58E-05    |
| PG0596 | rpsR 30S ribosomal protein S18                                                                    | Translation; Ribosomal<br>proteins                                | -3.96  | 0.0029703   |
| PG0315 | rl27 50S ribosomal protein L27                                                                    | Translation; Ribosomal<br>proteins                                | -4.021 | 0.000912602 |

|        |                                                                                  |                                                                                                |       |            |
|--------|----------------------------------------------------------------------------------|------------------------------------------------------------------------------------------------|-------|------------|
| PG2091 | folQ dihydroneopterin aldolase protein                                           | Biosynthesis of cofactors, prosthetic groups and carriers; Folic acid                          | -4.08 | 0.0741892  |
| PG0240 | Conserved hypothetical protein (possible phosphatase or hydrolase)               | Unknown                                                                                        | -4.13 | 0.00357654 |
| PG0935 | ipk isopentenyl monophosphate kinase                                             | Uncategorized                                                                                  | -4.14 | 0.0887651  |
| PG1959 | r133 50S ribosomal protein L33                                                   | Translation; Ribosomal proteins                                                                | -4.16 | 2.43E-05   |
| PG1599 | Conserved hypothetical protein                                                   | Unknown                                                                                        | -4.18 | 0.00326242 |
| PG0456 | Conserved hypothetical protein(possible ATPase component)                        | Unknown                                                                                        | -4.24 | 0.00825189 |
| PG1786 | Probable integral outer membrane protein P30                                     | Cell envelope                                                                                  | -4.25 | 9.81E-07   |
| PG1758 | rs15 30S ribosomal protein S15                                                   | Translation; Ribosomal proteins                                                                | -4.29 | 0.001882   |
| PG0991 | infC translation initiation factor 3 (IF-3)                                      | Translation; Translation factors                                                               | -4.34 | 0.00055    |
| PG2034 | hydG hydrogenase gamma subunit                                                   | Energy metabolism                                                                              | -4.42 | 0.000181   |
| PG0382 | Conserved hypothetical protein                                                   | Unknown                                                                                        | -4.43 | 0.005119   |
| PG0113 | Possible aminoglycoside N3-acetyltransferase (AAC3)                              | Cellular processes; Toxin production and resistance                                            | -4.44 | 0.003216   |
| PG1114 | panD aspartate 1-decarboxylase protein                                           | Biosynthesis of cofactors, prosthetic groups and carriers                                      | -4.48 | 0.053042   |
| PG0595 | rps6 rpsF 30S ribosomal protein S6                                               | Translation; Ribosomal proteins                                                                | -4.52 | 0.00037    |
| PG0505 | Hypothetical protein                                                             | Unknown                                                                                        | -4.53 | 0.006274   |
| PG0111 | Possible CAPK protein                                                            | Uncategorized                                                                                  | -4.60 | 0.002125   |
| PG0989 | r120 50S ribosomal protein L20                                                   | Translation; Ribosomal proteins                                                                | -4.90 | 0.008714   |
| PG1893 | Conserved hypothetical protein (with TPR repeat)                                 | Unknown                                                                                        | -4.90 | 0.006025   |
| PG0109 | Conserved hypothetical protein                                                   | Unknown                                                                                        | -4.96 | 0.005243   |
| PG1427 | Thiol protease (PrtT related)                                                    | Protein fate; Degradation of proteins, peptides and glycopeptides                              | -5.09 | 0.00026    |
| PG0274 | Hypothetical protein                                                             | Unknown                                                                                        | -5.10 | 0.010379   |
| PG1544 | Conserved hypothetical protein                                                   | Unknown                                                                                        | -5.14 | 0.000492   |
| PG2139 | Hypothetical protein                                                             | Unknown                                                                                        | -5.19 | 2.48E-06   |
| PG0710 | fkbp-type peptidyl-prolyl cis-trans isomerase (MIP-like protein)                 | Protein fate; Protein folding and stabilization                                                | -5.24 | 0.001207   |
| PG0314 | r121 50S ribosomal protein L21                                                   | Translation; Ribosomal proteins                                                                | -5.26 | 0.00075    |
| PG1974 | Hypothetical protein                                                             | Hypothetical                                                                                   | -5.27 | 0.000705   |
| PG1235 | Conserved hypothetical protein (possible nucleoside diphosphate-sugar epimerase) | Unknown                                                                                        | -5.31 | 0.000123   |
| PG0108 | wecC UDP-N-acetyl-D-mannosaminuronic acid dehydrogenase                          | Cell envelope; Biosynthesis and degradation of surface polysaccharides and lipopolysaccharides | -5.35 | 1.34E-05   |

|        |                                                                            |                                                                                                                                                     |        |          |
|--------|----------------------------------------------------------------------------|-----------------------------------------------------------------------------------------------------------------------------------------------------|--------|----------|
| PG1801 | atpE ATP synthase subunit E                                                | Energy metabolism; ATP-proton motive force                                                                                                          | -5.36  | 0.000231 |
| PG0650 | Conserved hypothetical protein                                             | Unknown                                                                                                                                             | -5.37  | 0.000252 |
| PG0762 | tig trigger factor (peptidyl prolyl cis-trans isomerase)                   | Protein fate; Protein folding and stabilization                                                                                                     | -5.38  | 0.000321 |
| PG0385 | rs21 30S ribosomal protein S21                                             | Translation; Ribosomal proteins                                                                                                                     | -5.48  | 0.001181 |
| PG0202 | hemD uroporphyrinogen-III synthase                                         | Biosynthesis of cofactors, prosthetic groups, and carriers; Heme, porphyrin, and cobalamin NG0359 Cellular processes; Protein and peptide secretion | -5.51  | 2.56E-05 |
| PG1429 | Hypothetical protein                                                       | Unknown                                                                                                                                             | -5.58  | 0.008899 |
| PG2044 | Conserved hypothetical protein                                             | Unknown                                                                                                                                             | -5.58  | 0.000146 |
| PG1138 | PorR protein                                                               | Uncategorized                                                                                                                                       | -5.77  | 3.90E-05 |
| PG1139 | Hypothetical protein                                                       | Unknown                                                                                                                                             | -5.92  | 0.000931 |
| PG1788 | Conserved hypothetical protein (putative cysteine peptidase)               | Unknown                                                                                                                                             | -6.20  | 0.000468 |
| PG0712 | Hypothetical protein (possible PAS/PAC domain)                             | Unknown                                                                                                                                             | -6.31  | 0.00093  |
| PG0556 | Hypothetical protein                                                       | Unknown                                                                                                                                             | -6.35  | 0.008845 |
| PG0616 | Hypothetical protein (putative thioredoxin)                                | Unknown                                                                                                                                             | -6.61  | 0.000153 |
| PG0201 | Ribonuclease P protein component                                           | Unknown                                                                                                                                             | -7.11  | 0.000173 |
| PG0563 | Hypothetical protein                                                       | Unknown                                                                                                                                             | -7.31  | 0.192008 |
| PG1135 | epsC glycosyltransferase                                                   | Uncategorized                                                                                                                                       | -7.49  | 0.000505 |
| PG0994 | Hypothetical protein                                                       | Unknown                                                                                                                                             | -7.57  | 0.001942 |
| PG0803 | nagB glucosamine-6-phosphate isomerase (glucosamine-6-phosphate deaminase) | Energy metabolism; Sugars                                                                                                                           | -7.81  | 0.099067 |
| PG1547 | prtT trypsin-like proteinase                                               | Protein fate; Degradation of proteins, peptides and glycopeptides                                                                                   | -7.83  | 0.006372 |
| PG0617 | Hypothetical protein                                                       | Unknown                                                                                                                                             | -8.04  | 0.000534 |
| PG1894 | Hypothetical protein                                                       | Unknown                                                                                                                                             | -8.28  | 0.00063  |
| PG1140 | wbbL probable rhamnosyltransferase                                         | Cell envelope                                                                                                                                       | -8.54  | 0.002035 |
| PG1428 | ribE riboflavin synthase beta subunit                                      | Biosynthesis of cofactors, prosthetic groups and carriers; Riboflavin, FMN and FAD                                                                  | -8.70  | 2.40E-05 |
| PG1841 | Conserved hypothetical protein                                             | Unknown                                                                                                                                             | -9.73  | 0.006899 |
| PG0195 | Rubrerythrin                                                               | Energy metabolism; Electron transport                                                                                                               | -12.53 | 0.000142 |
| PG1222 | Hypothetical protein                                                       | Unknown                                                                                                                                             | -20.33 | 0.005532 |
| PG0627 | RNA binding protein                                                        | Transcription                                                                                                                                       | -22.63 | 1.05E-05 |

<sup>a</sup>Differentially expressed genes were determined using fold-change ( $\geq 2$ ) plus  $p$  ( $\leq 0.05$ ) with FDR = 0.05.
